# Supplementary material
Source: PubMed Central journal article supplement (PMC5837250)
Supplement: brain-2017-01380-file011_awx320.pdf [file brain-2017-01380-file011_awx320.pdf]

- ▲ Cognitively Unimpaired Low Amyloid
- ◆ Cognitively Unimpaired Intermediate Amyloid
- Cognitively Unimpaired High Amyloid
- Cognitively Impaired High amyloid

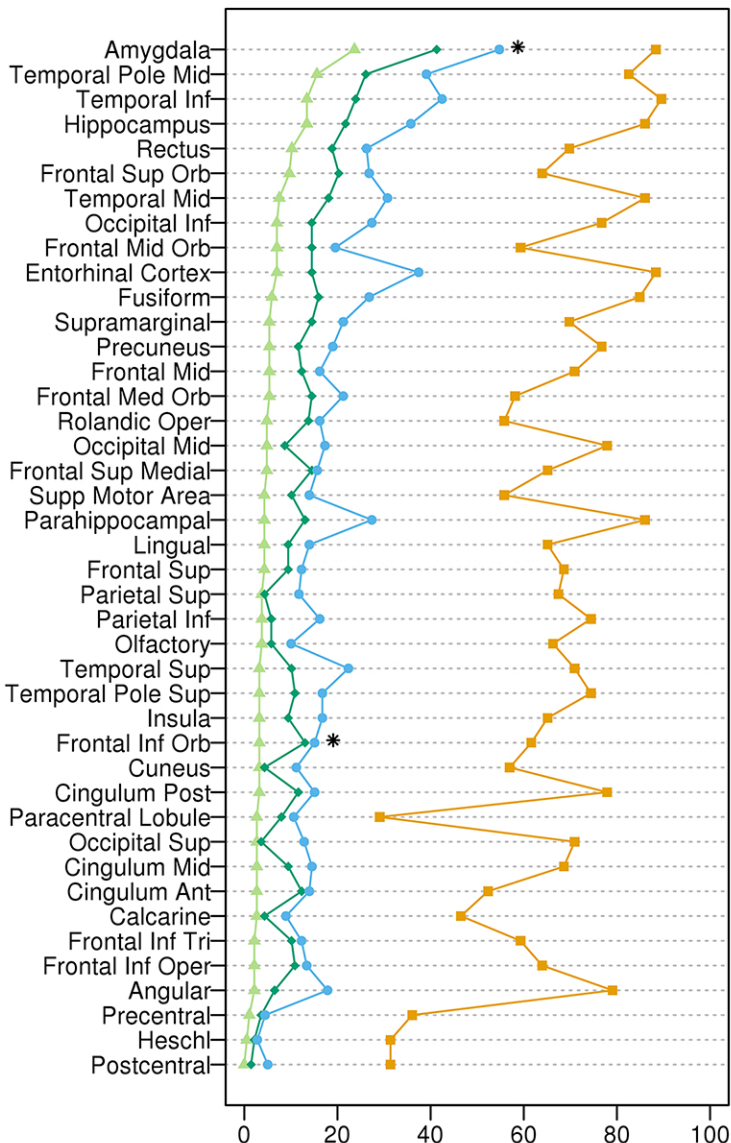

Supplemental Figure 3.

% elevated tau-PET
