# Supplementary material
Source: PubMed Central journal article supplement (PMC5837250)

- Cognitively Unimpaired Normal Amyloid
- Cognitively Unimpaired Abnormal Amyloid
- Amnestic Mild Cognitive Impairment Abnormal Amyloid
- Alzheimer's Disease Dementia Abnormal Amyloid

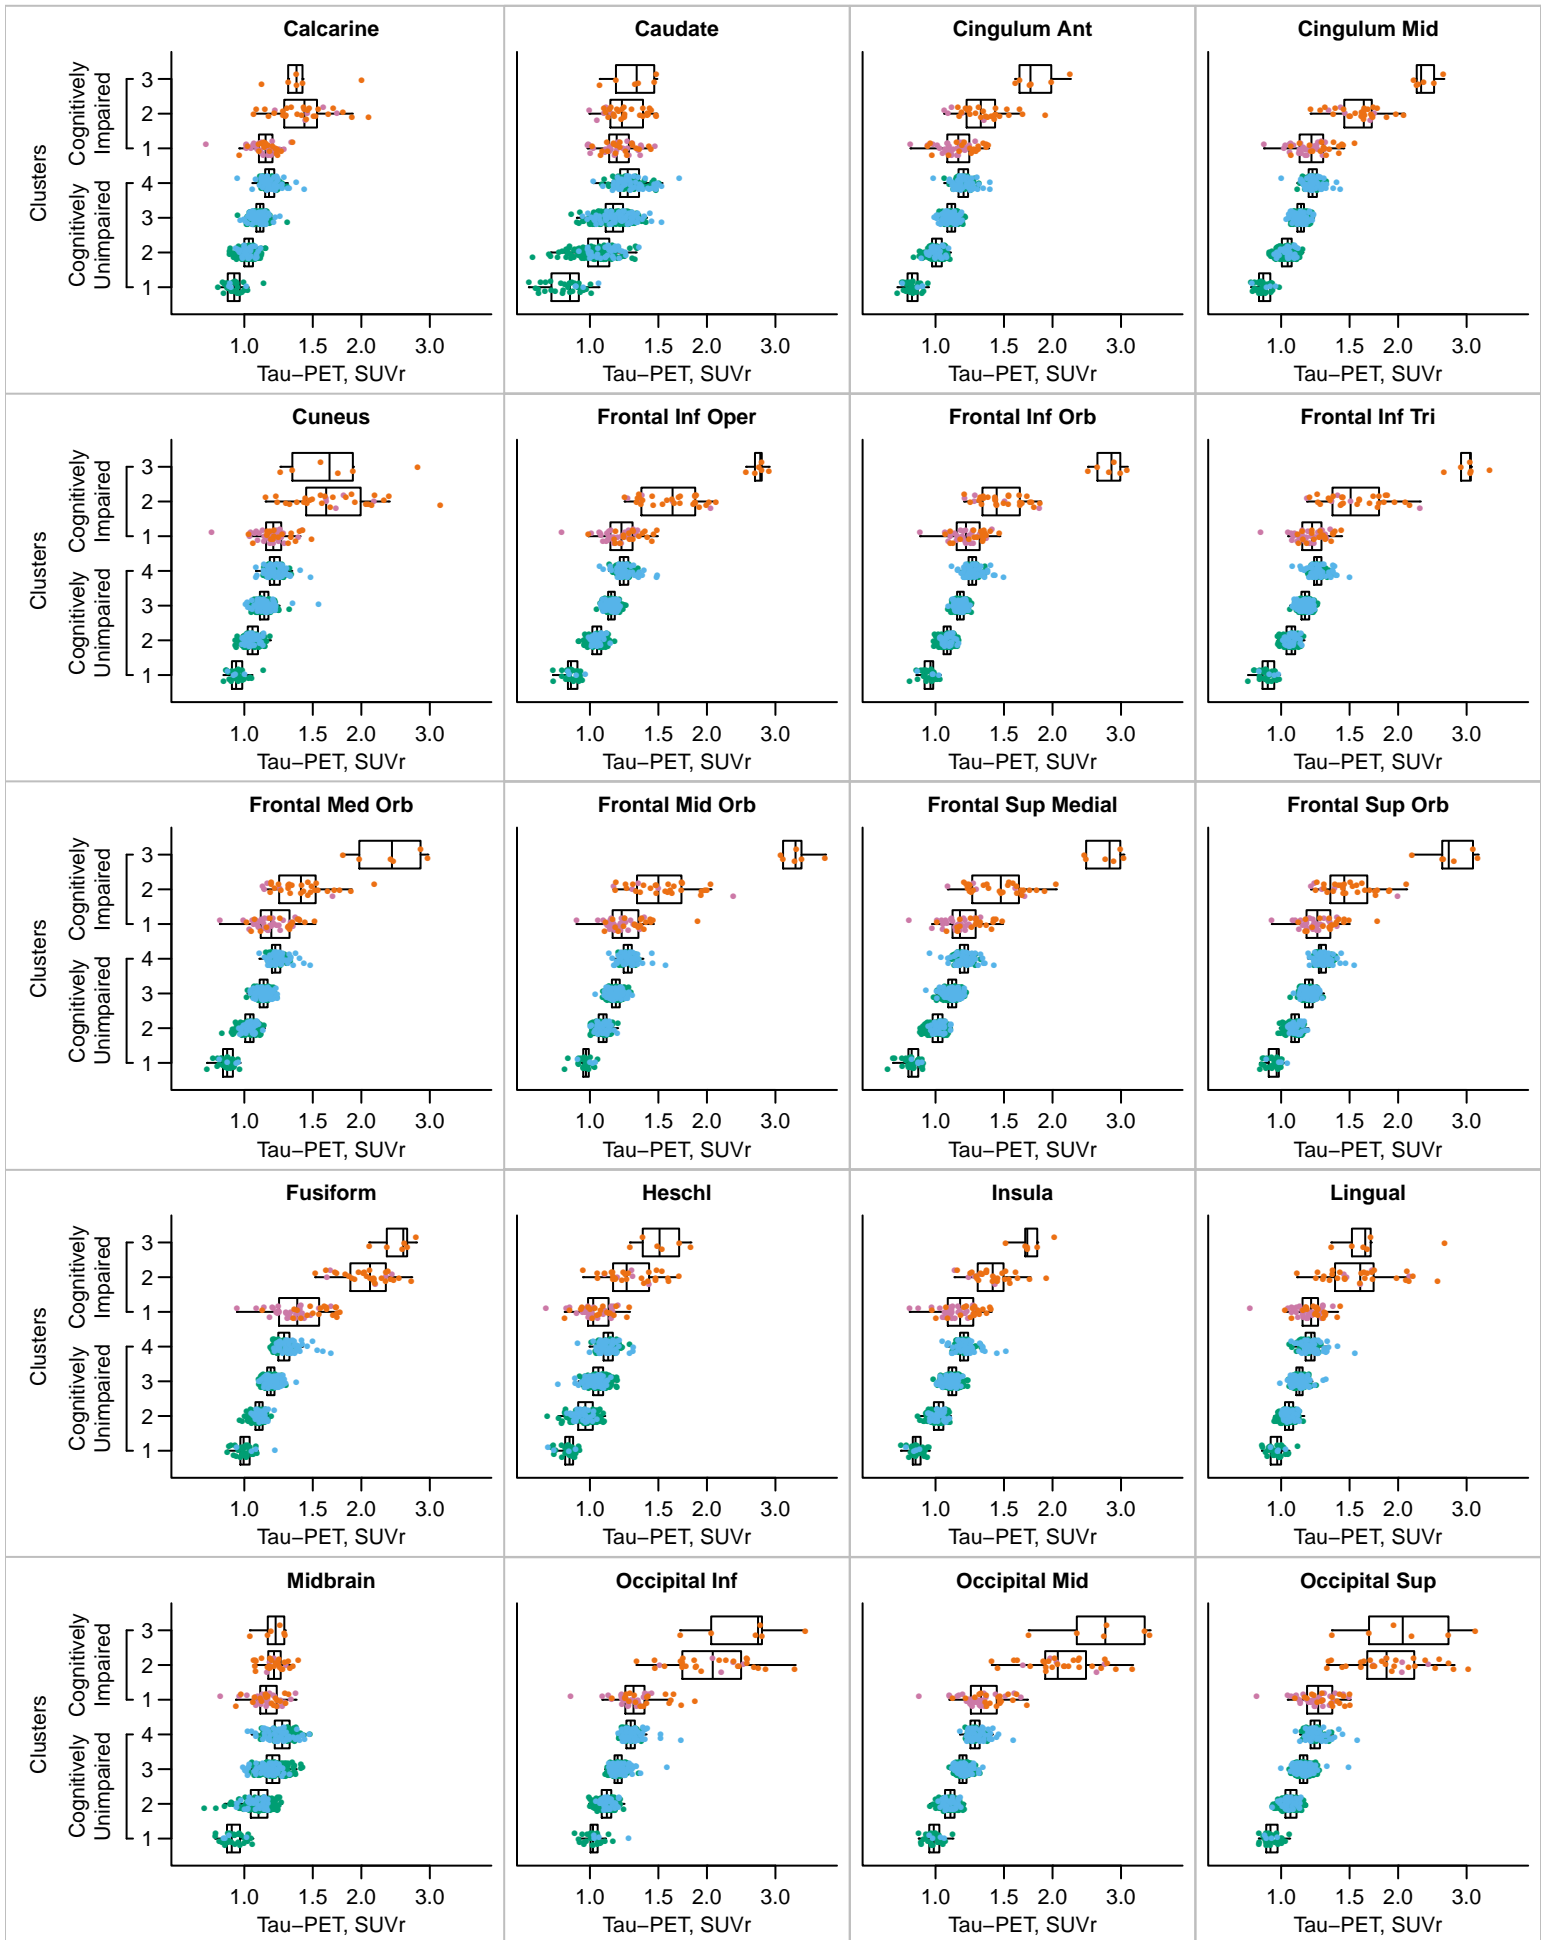

- Cognitively Unimpaired Normal Amyloid
- Cognitively Unimpaired Abnormal Amyloid
- Amnesic Mild Cognitive Impairment Abnormal Amyloid
- Alzheimer's Disease Dementia Abnormal Amyloid

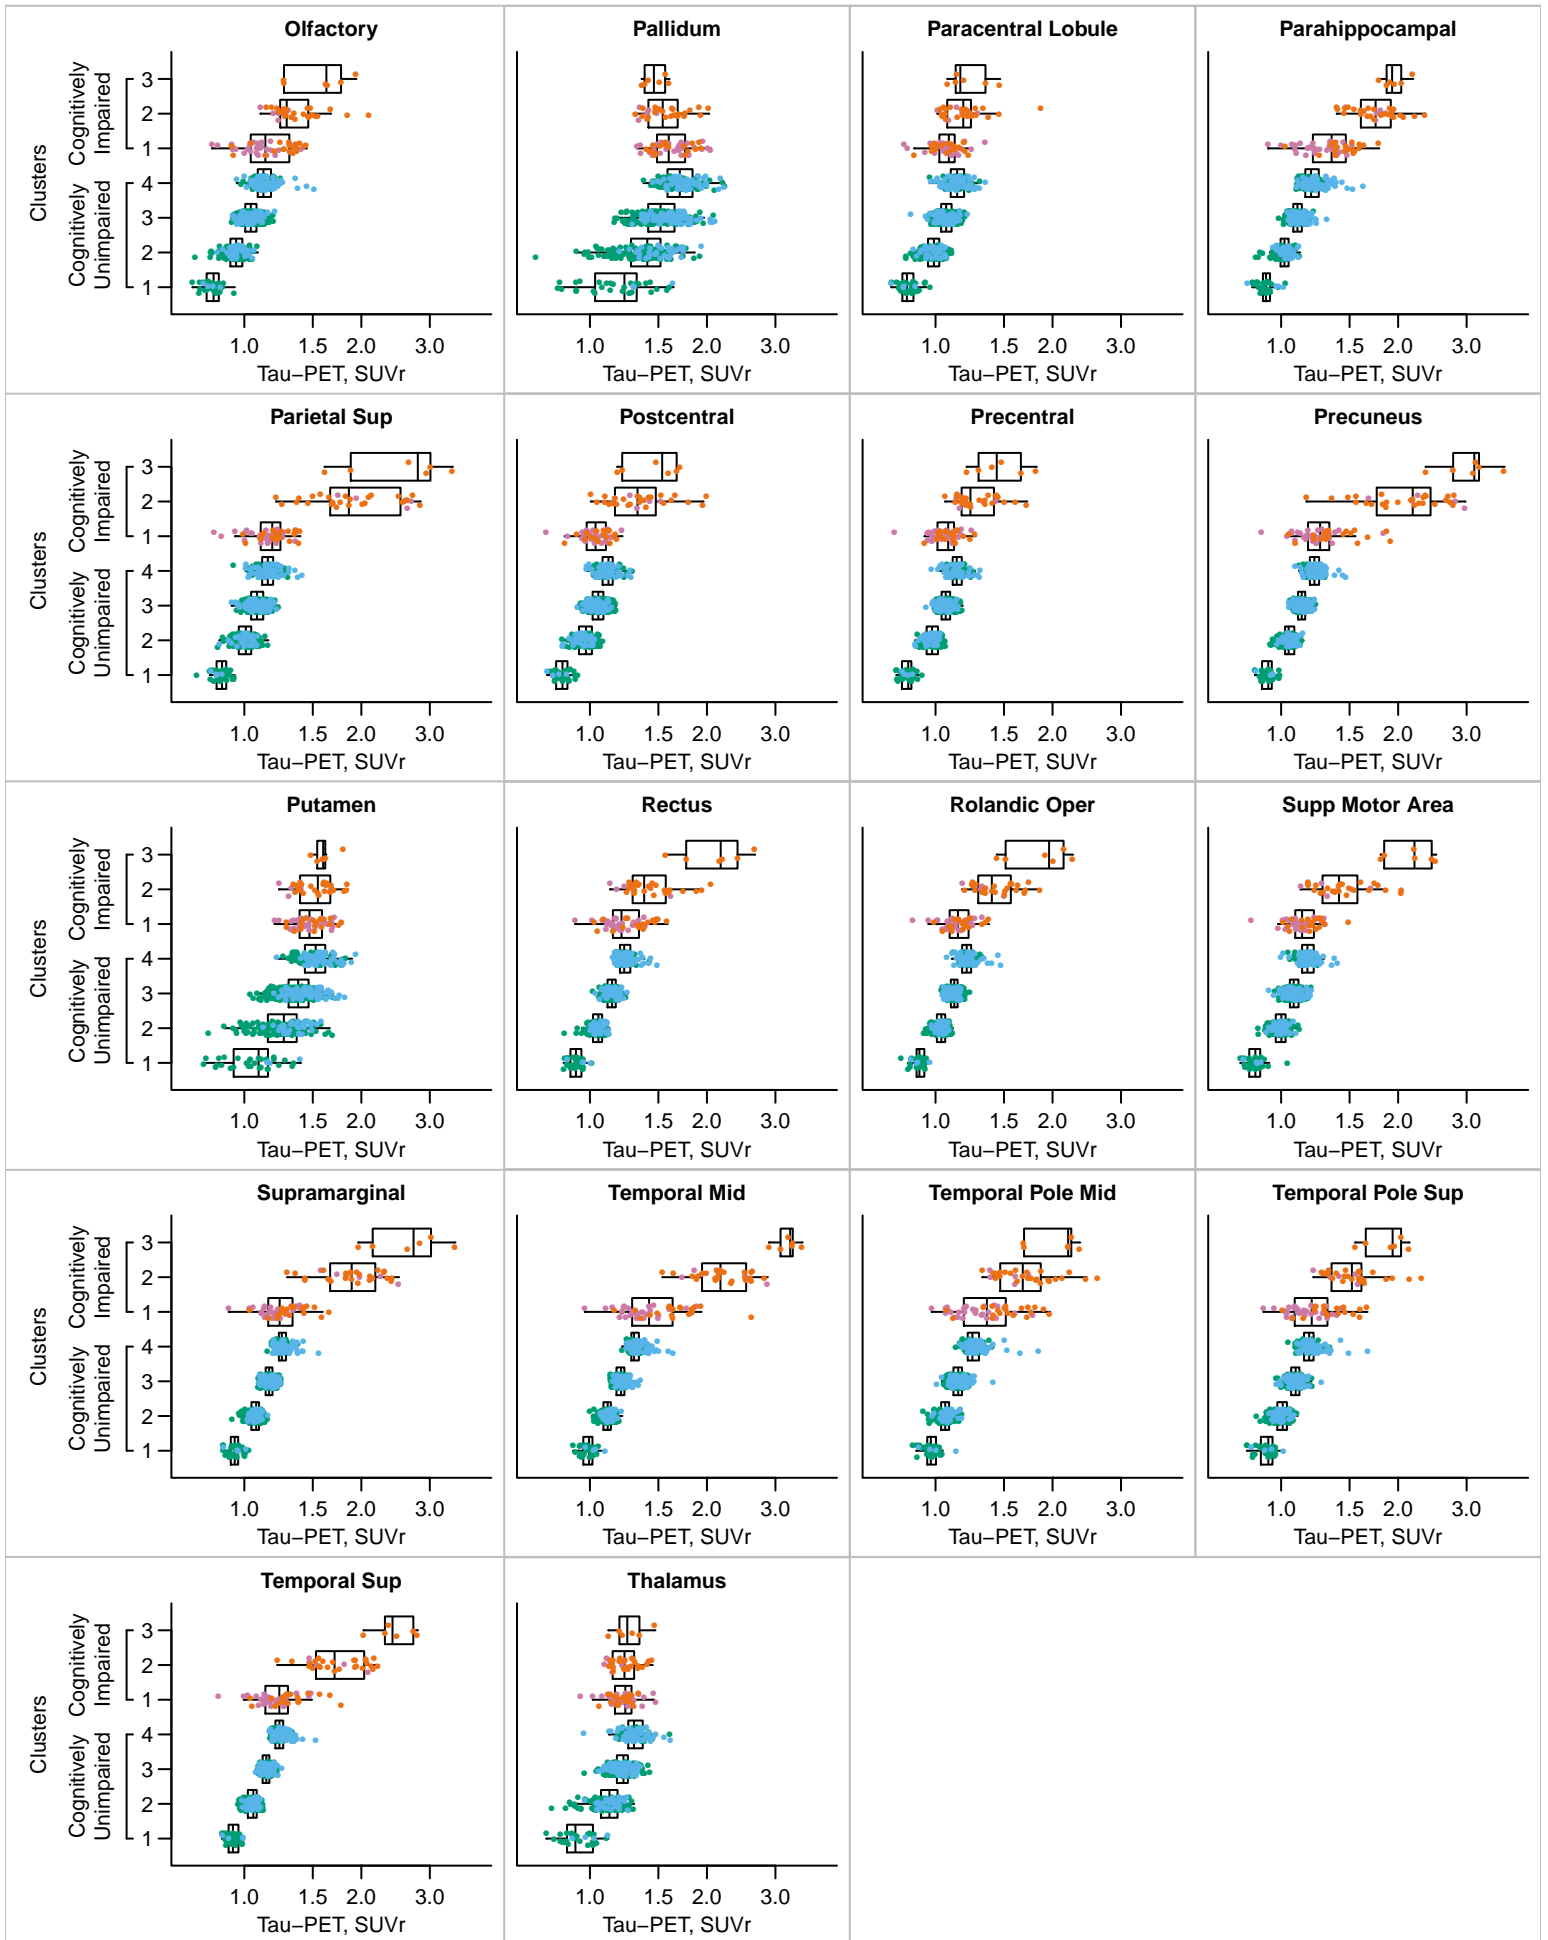

Supplement: brain-2017-01380-file014_awx320.pdf [file brain-2017-01380-file014_awx320.pdf]
