# Supplementary material
Source: PubMed Central journal article supplement (PMC5837250)

## Cognitively Unimpaired

$\rho=0.64$  ( $p<0.001$ )

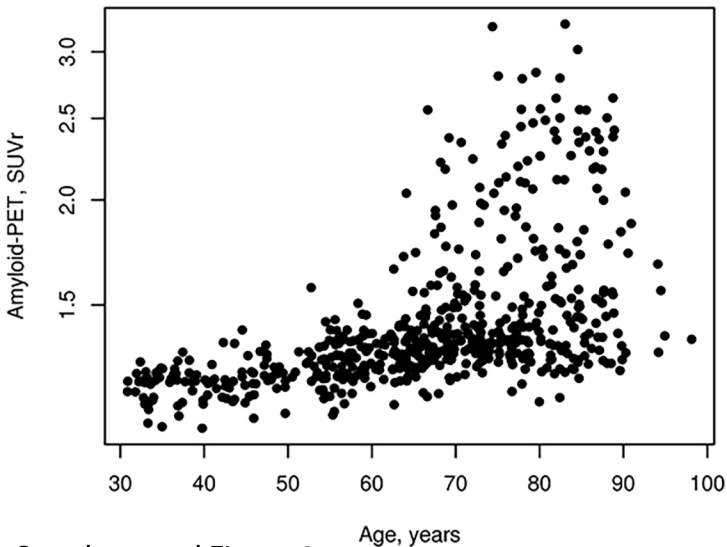

Supplemental Figure 2.

Supplement: brain-2017-01380-file010_awx320.pdf [file brain-2017-01380-file010_awx320.pdf]

Distance between clusters  
(difference in error sums of squares)

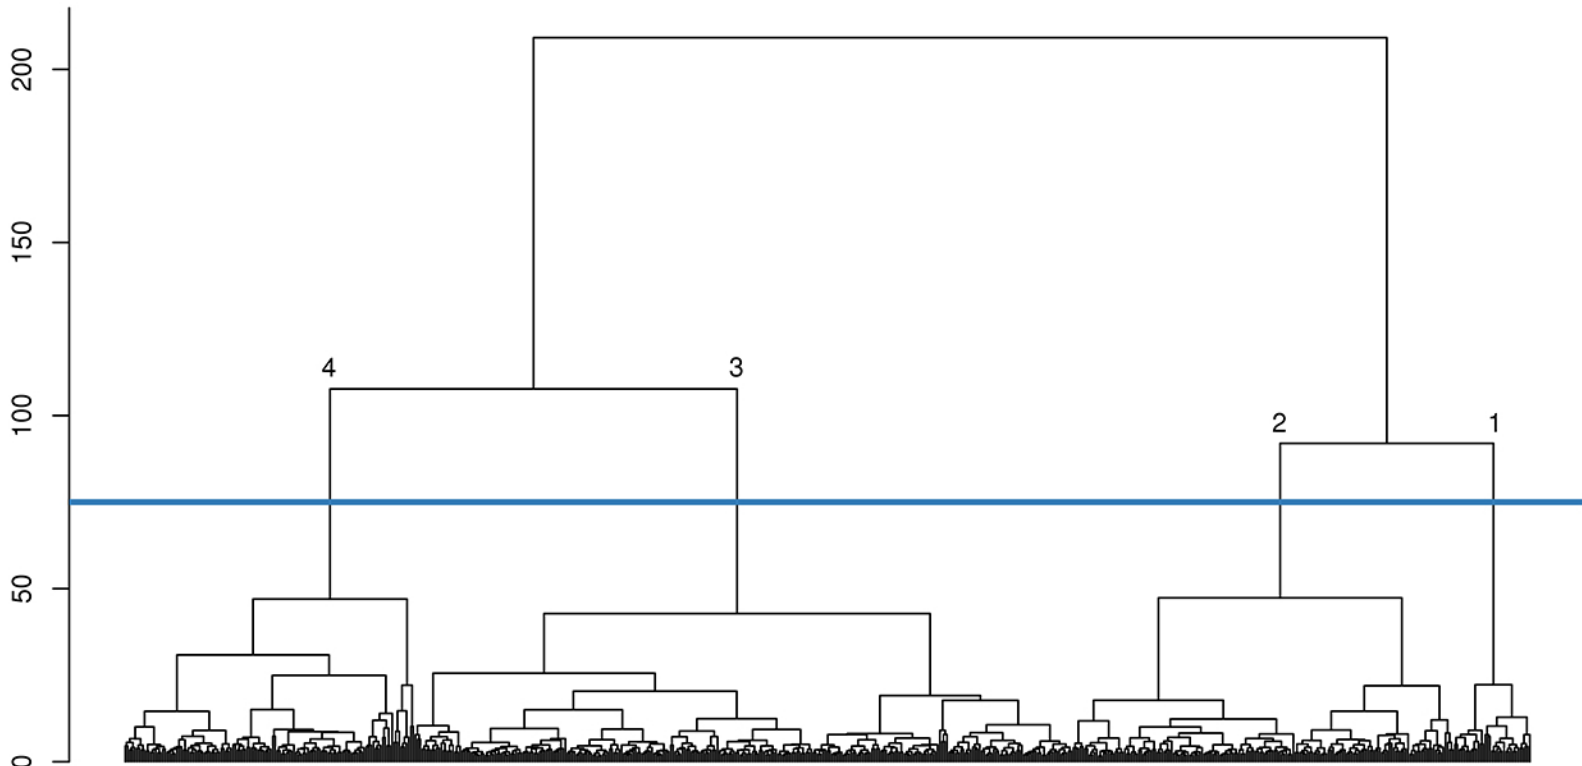

Supplemental Figure 4.

Supplement: brain-2017-01380-file012_awx320.pdf [file brain-2017-01380-file012_awx320.pdf]

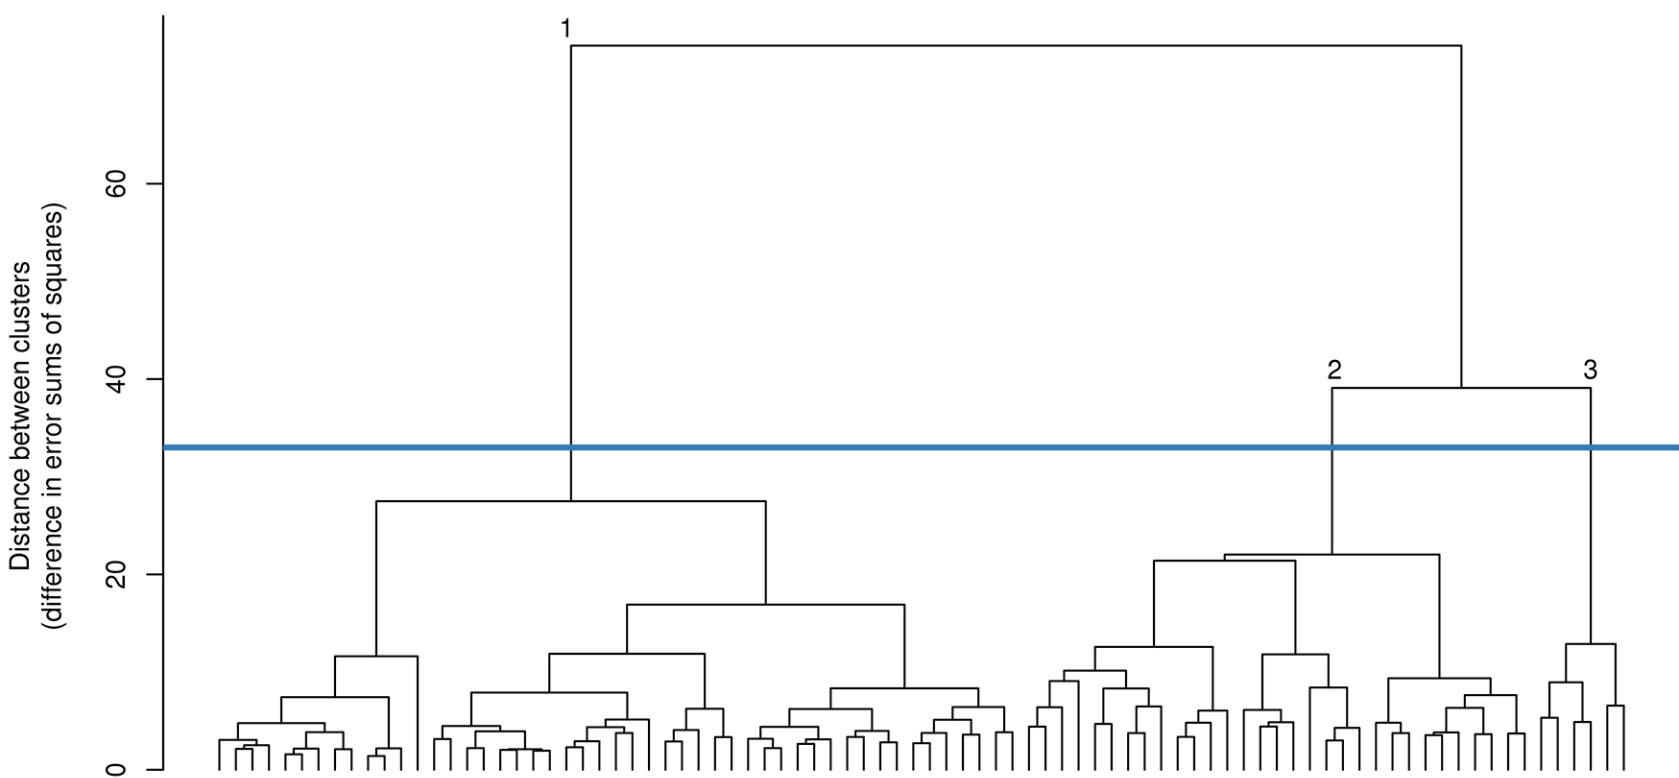

Supplemental Figure 5.

Supplement: brain-2017-01380-file013_awx320.pdf [file brain-2017-01380-file013_awx320.pdf]
